# Supplementary material
Source: publisher figshare collection journal article supplement (https://gsajournals.figshare.com/ndownloader/files/21399339)
Supplement: Supplementary file 1 [file 21399339]

**Table S11. Genomic locations of genes and mutants related to tiller development, photoperiod sensitivity, circadian clock, and spike morphology in barley compiled for candidate gene analysis.**

| Gene ID | Gene/Mutant Name | Protein Annotation | Chr | Gene/  Interval  Start (bp)*a* | POPSEQ  Pos (cM)*a* | References |
| --- | --- | --- | --- | --- | --- | --- |
| Tillering Genes | | | | | | |
| HORVU2Hr1G011730 | *ELIGULUM-A* (*ELI-A*) | Putative transposon with RNase H domain | 2 | 24295416 | 15.52 | (Okagaki et al., 2018) |
| Not applicable (NA) | *many noded dwarf1 (mnd1)* | NA | 2 | 100641977 | 52.61- 56.77 | (Druka et al., 2011) |
| NA | *absent lower laterals (als)* | NA | 3 | 601474414 | 86.44- 109.61 | (Druka et al., 2011) |
| HORVU3Hr1G085720 | *JUBEL2* or *LOW NUMBER OF TILLERS 1* (*LNT1*) | BEL1-like homeodomain transcription factor | 3 | 613897933 | 92.71 | (Dabbert et al., 2010) |
| HORVU3Hr1G106880 | *UNICULME4* (*CUL4*) | BLADE-ON-PETIOLE (BOP) 1/2-like BTB-ankyrin repeat containing protein | 3 | 671495852 | 137.71 | (Tavakol et al., 2015) |
| HORVU4Hr1G007040 | *INTERMEDIUM-C* (*INT-C*)/*HvTEOSINTE-BRANCHED 1* (*HvTB1*) | TCP transcription factor | 4 | 17599033 | 32.04 | (Ramsay et al., 2011) |
| HORVU5Hr1G081060 | *MANY NODED DWARF* (*MND*) | Cytochrome P450 homologous to rice PLASTOCHRON 1 | 5 | 562934361 | 97.09 | (Mascher et al., 2014) |
| NA | *uniculm2* (*cul2*) | NA | 6 | 423193924 | 60.19- 60.72 | (Druka et al., 2011; Okagaki et al., 2013) |
| NA | *granum-a* (*gra-a*) | NA | 7 | 636617013 | 126.2 | (Druka et al., 2011) |
| Circadian Clock and Flowering Genes | | | | | | |
| HORVU1Hr1G076430 | *PHOTOPERIOD-H2* (*PPD-H2*) | FLOWERING LOCUS T-like | 1 | 514098182 | 94.01 | (Faure et al., 2007; Laurie et al., 1995) |
| HORVU1Hr1G094980 | *praematurum.a-8* (*mat.a-8*)/ *early maturity 8* (*eam8*) | EARLY FLOWERING3-like - Nuclear protein involved in phytochrome B signaling | 1 | 556900385 | 132.54 | (Boden et al., 2014) |
| HORVU2Hr1G013400 | *PHOTOPERIOD-H1* | Two-component pseudo response regulator | 2 | 29123785 | 19.15 | (Turner et al., 2005) |
| HORVU2Hr1G023180 | *FLOWERING LOCUS T 4*-like (*FT4*) | FLOWERING LOCUS T-like | 2 | 68833704 | 47.46 | (Faure et al., 2007) |
| HORVU2Hr1G063800 | *HvMADS15* | APETALA1-like MADS box transcription factor | 2 | 432051592 | 58.76 | (Kobayashi et al., 2012; Schmitz et al., 2000) |
| HORVU2Hr1G072750 | *CENTRORADIALIS* (*CEN*) | Phosphatidylethanolamine-binding protein | 2 | 523377523 | 58.7 | (Comadran et al., 2012) |
| HORVU2Hr1G085910 | *CONSTANS 4*-like (*CO4*) | Transcription factor with a CCT domain | 2 | 620631167 | 65.61 | (Griffiths et al., 2003) |
| HORVU3Hr1G021140 | *GIGANTEA* (*GI*) | Nuclear protein involved in phytochrome B signaling | 3 | 67421434 | 45.8 | (Russell et al., 2016) |
| HORVU3Hr1G027590 | *FLOWERING LOCUS T 2*-like (*FT2*) | *FLOWERING LOCUS T-like* | 3 | 119252011 | 45.5 | (Russell et al., 2016) |
| HORVU3Hr1G079640 | *FLOWERING LOCUS D 4-*like (*FDL4*) | bZIP transcription factor | 3 | 584357437 | 76.45 | (Li et al., 2015) |
| HORVU3Hr1G086000 | *LUX ARRHYTHMO*-like (*LUX*)/ *early maturity 10* (*eam10*) | Myb family transcription factor | 3 | 615106969 | 92.71 | (Campoli et al., 2013) |
| HORVU4Hr1G021010 | PSUEDO RESPONSE REGULATOR 59-like (PRR59) | Two-component pseudo response regulator | 4 | 105940577 | 51.3 | (Campoli et al., 2012) |
| HORVU4Hr1G039300 | *FLAVIN-BINDING, KELCH REPEAT, F-BOX 1*-like (*FKF1*) | Flavin-Binding, Kelch Repeat, F-Box protein | 4 | 300696992 | 52.5 | (Calixto et al., 2015) |
| AK361423*b* | *FLOWERING LOCUS D 5*-like (*FDL5*) | bZIP transcription factor | 4 | 427458289 | 51.51 | (Li et al., 2015) |
| HORVU4Hr1G090390 | *FLOWERING LOCUS T 5*-like (*FT5*) | *FLOWERING LOCUS T-like* | 4 | 645064417 | 116.98 | (Faure et al., 2007) |
| HORVU5Hr1G060000 | *EARLY FLOWERING 4-like* (*ELF4*) | Nuclear protein involved in phytochrome B signaling | 5 | 469024048 | 48.4 | (Russell et al., 2016) |
| HORVU5Hr1G081620 | PSUEDO RESPONSE REGULATOR 95-like (PRR95) | Two-component pseudo response regulator | 5 | 565156282 | 97.1 | (Calixto et al., 2015) |
| HORVU5Hr1G095630 | *VERNALIZATION-H1* (*VRN-H1*) | MADS box transcription factor | 5 | 599122941 | 126.01 | (Fu et al., 2005) |
| HORVU6Hr1G022330 | *ZEITLUPEb* (*ZTLb*) | F-box protein, part of SCF complex that degrades TOC1 | 6 | 70576253 | 49.32 | (Calixto et al., 2015) |
| HORVU6Hr1G057630 | *TIMING OF CHLOROPHYLL A/B BINDING PROTEIN 1* (*TOC1*) | Two-component pseudo response regulator | 6 | 374866560 | 55.4 | (Calixto et al., 2015) |
| MLOC_75496† | *CONSTANS 2*-like (*CO2*) | Transcription factor with a CCT domain | 6 | 504463498 | 68.23 | (Calixto et al., 2015) |
| HORVU7Hr1G024610 | *HvFLOWERING LOCUS T-LIKE (HVFT1) /VERNALIZATION-H3* (*VRN-H3*) | FLOWERING LOCUS T-like | 7 | 39679905 | 33.67 | (Yan et al., 2006) |
| HORVU7Hr1G043030 | *CONSTANS 1*-like (*CO1*) | Transcription factor with a CCT domain | 7 | 127667781 | 67.91 | (Calixto et al., 2015) |
| HORVU7Hr1G070870 | *HvCIRCADIAN CLOCK ASSOCIATED 1 (HvCCA1)/HvLATE ELONGED HYPOCOTYL*-like (*HvLHY-like*) | Myb family transcription factor | 7 | 385861846 | 70.8 | (Campoli et al., 2012; Ford et al., 2016; Russell et al., 2016) |
| HORVU7Hr1G099010 | *ZEITLUPEa* (*ZTLa*) | F-box protein, part of SCF complex that degrades TOC1 | 7 | 599452510 | 97.3 | (Calixto et al., 2015) |
| Spike Morphology Genes | | | | | | |
| HORVU1Hr1G051010 | *SIX-ROWED SPIKE 3* (*VRS3*) | Histone demethylase | 1 | 378411487 | 49.02 | (van Esse et al., 2017) |
| HORVU2Hr1G092290 | *SIX-ROWED SPIKE 1* (*VRS1*) | Homeodomain leucine zipper protein | 2 | 652031057 | 80.22 | (Komatsuda et al., 2007) |
| HORVU2Hr1G113880 | *ZEOCRITON* (*ZEO*) | APETALA2-like ethylene-responsive element binding protein | 2 | 730026693 | 127.08 | (Houston et al., 2013) |
| HORVU3Hr1G016690 | *SIX-ROWED SPIKE 4* (*VRS4*) | RAMOSA2-like lateral organ boundary (LOB) domain protein | 3 | 40939171 | 41.71 | (Koppolu et al., 2013) |
| MLOC_61451.6*c* | *laxatum-a* (*lax-a*) | BOP1/2-like BTB-ankyrin repeat containing protein | 5 | 332395826 | 44.09 | (Jost et al., 2016) |
| HORVU5Hr1G061840 | *DENSE AND ERECT PANICLE 1* (*DEP1*)/ *Breviaristatum-e* (*ari-e*) | DEP1/ari-e | 5 | 482214542 | 53.36 | (Huang et al., 2009) |
| NA | *intermedium-b* (*int-b*) | NA | 5 | 556603279 | 91- 139.11 | (Druka et al., 2011) |
| NA | *intermedium-m* (*int-m*) | NA | 5 | 640705320 | 150.7- 158.23 | (Druka et al., 2011) |

*a*References for positions (Beier et al., 2017; Mascher et al., 2013, 2017)

*b*Aligned to 2016 low confidence gene annotated as "undescribed"

*c*Aligned to 2016 high confidence gene but gene was annotated improperly

**References**

Beier, S., Himmelbach, A., Colmsee, C., Zhang, X.-Q., Barrero, R.A., Zhang, Q., Li, L., Bayer, M., Bolser, D., Taudien, S., et al. (2017). Construction of a map-based reference genome sequence for barley, *Hordeum vulgare* L. Sci. Data *4*, 170044.

Boden, S.A., Weiss, D., Ross, J.J., Davies, N.W., Trevaskis, B., Chandler, P.M., and Swain, S.M. (2014). EARLY FLOWERING3 Regulates Flowering in Spring Barley by Mediating Gibberellin Production and *FLOWERING LOCUS T* Expression. Plant Cell *26*, 1557–1569.

Calixto, C.P.G., Waugh, R., and Brown, J.W.S. (2015). Evolutionary Relationships Among Barley and Arabidopsis Core Circadian Clock and Clock-Associated Genes. J. Mol. Evol. *80*, 108–119.

Campoli, C., Shtaya, M., Davis, S.J., and von Korff, M. (2012). Expression conservation within the circadian clock of a monocot: natural variation at barley *Ppd-H1* affects circadian expression of flowering time genes, but not clock orthologs. BMC Plant Biol. *12*, 1–15.

Campoli, C., Pankin, A., Drosse, B., Casao, C.M., Davis, S.J., and von Korff, M. (2013). *HvLUX1* is a candidate gene underlying the early maturity 10 locus in barley: phylogeny, diversity, and interactions with the circadian clock and photoperiodic pathways. New Phytol. *199*, 1045–1059.

Comadran, J., Kilian, B., Russell, J., Ramsay, L., Stein, N., Ganal, M., Shaw, P., Bayer, M., Thomas, W., Marshall, D., et al. (2012). Natural variation in a homolog of Antirrhinum *CENTRORADIALIS* contributed to spring growth habit and environmental adaptation in cultivated barley. Nat. Genet. *44*, 1388–1392.

Dabbert, T., Okagaki, R.J., Cho, S., Heinen, S., Boddu, J., and Muehlbauer, G.J. (2010). The genetics of barley low-tillering mutants: *low number of tillers-1* (*lnt1*). Theor. Appl. Genet. *121*, 705–715.

Druka, A., Franckowiak, J., Lundqvist, U., Bonar, N., Alexander, J., Houston, K., Radovic, S., Shahinnia, F., Vendramin, V., Morgante, M., et al. (2011). Genetic Dissection of Barley Morphology and Development. Plant Physiol. *155*, 617–627.

van Esse, G.W., Walla, A., Finke, A., Koornneef, M., Pecinka, A., and von Korff, M. (2017). Six-rowed spike 3 (VRS3) is a histone demethylase that controls lateral spikelet development in barley. Plant Physiol. *174*, 2397–2408.

Faure, S., Higgins, J., Turner, A., and Laurie, D.A. (2007). The *FLOWERING LOCUS T-Like* Gene Family in Barley (*Hordeum vulgare*). Genetics *176*, 599–609.

Ford, B., Deng, W., Clausen, J., Oliver, S., Boden, S., Hemming, M., and Trevaskis, B. (2016). Barley (*Hordeum vulgare*) circadian clock genes can respond rapidly to temperature in an EARLY FLOWERING 3-dependent manner. J. Exp. Bot. *67*, 5517–5528.

Fu, D., Szűcs, P., Yan, L., Helguera, M., Skinner, J.S., Zitzewitz, J. von, Hayes, P.M., and Dubcovsky, J. (2005). Large deletions within the first intron in *VRN-1* are associated with spring growth habit in barley and wheat. Mol. Genet. Genomics *273*, 54–65.

Griffiths, S., Dunford, R.P., Coupland, G., and Laurie, D.A. (2003). The Evolution of *CONSTANS-Like* Gene Families in Barley, Rice, and Arabidopsis. Plant Physiol. *131*, 1855–1867.

Houston, K., McKim, S.M., Comadran, J., Bonar, N., Druka, I., Uzrek, N., Cirillo, E., Guzy-Wrobelska, J., Collins, N.C., Halpin, C., et al. (2013). Variation in the interaction between alleles of *HvAPETALA2* and microRNA172 determines the density of grains on the barley inflorescence. Proc. Natl. Acad. Sci. *110*, 16675–16680.

Huang, X., Qian, Q., Liu, Z., Sun, H., He, S., Luo, D., Xia, G., Chu, C., Li, J., and Fu, X. (2009). Natural variation at the *DEP1* locus enhances grain yield in rice. Nat. Genet. *41*, 494–497.

Jost, M., Taketa, S., Mascher, M., Himmelbach, A., Yuo, T., Shahinnia, F., Rutten, T., Druka, A., Schmutzer, T., Steuernagel, B., et al. (2016). A Homolog of Blade-On-Petiole 1 and 2 (BOP1/2) Controls Internode Length and Homeotic Changes of the Barley Inflorescence. Plant Physiol. *171*, 1113–1127.

Kobayashi, K., Yasuno, N., Sato, Y., Yoda, M., Yamazaki, R., Kimizu, M., Yoshida, H., Nagamura, Y., and Kyozuka, J. (2012). Inflorescence meristem identity in rice is specified by overlapping functions of three *AP1/FUL*-like MADS box genes and *PAP2*, a *SEPALLATA* MADS box gene. Plant Cell *24*, 1848–1859.

Komatsuda, T., Pourkheirandish, M., He, C., Azhaguvel, P., Kanamori, H., Perovic, D., Stein, N., Graner, A., Wicker, T., Tagiri, A., et al. (2007). Six-rowed barley originated from a mutation in a homeodomain-leucine zipper I-class homeobox gene. Proc. Natl. Acad. Sci. *104*, 1424–1429.

Koppolu, R., Anwar, N., Sakuma, S., Tagiri, A., Lundqvist, U., Pourkheirandish, M., Rutten, T., Seiler, C., Himmelbach, A., Ariyadasa, R., et al. (2013). *Six-rowed spike4* (*Vrs4*) controls spikelet determinacy and row-type in barley. Proc. Natl. Acad. Sci. *110*, 13198–13203.

Laurie, D.A., Pratchett, N., Snape, J.W., and Bezant, J.H. (1995). RFLP mapping of five major genes and eight quantitative trait loci controlling flowering time in a winter × spring barley (*Hordeum vulgare* L.) cross. Genome *38*, 575–585.

Li, C., Lin, H., and Dubcovsky, J. (2015). Factorial Combinations of Protein Interactions Generate a Multiplicity of Florigen Activation Complexes in Wheat and Barley. Plant J. Cell Mol. Biol. *84*, 70–82.

Mascher, M., Muehlbauer, G.J., Rokhsar, D.S., Chapman, J., Schmutz, J., Barry, K., Muñoz-Amatriaín, M., Close, T.J., Wise, R.P., Schulman, A.H., et al. (2013). Anchoring and ordering NGS contig assemblies by population sequencing (POPSEQ). Plant J. *76*, 718–727.

Mascher, M., Jost, M., Kuon, J.-E., Himmelbach, A., Aßfalg, A., Beier, S., Scholz, U., Graner, A., and Stein, N. (2014). Mapping-by-sequencing accelerates forward genetics in barley. Genome Biol. *15*, 1–15.

Mascher, M., Gundlach, H., Himmelbach, A., Beier, S., Twardziok, S.O., Wicker, T., Radchuk, V., Dockter, C., Hedley, P.E., Russell, J., et al. (2017). A chromosome conformation capture ordered sequence of the barley genome. Nature *544*, 427–433.

Okagaki, R.J., Cho, S., Kruger, W.M., Xu, W.W., Heinen, S., and Muehlbauer, G.J. (2013). The barley *UNICULM2* gene resides in a centromeric region and may be associated with signaling and stress responses. Funct. Integr. Genomics *13*, 33–41.

Okagaki, R.J., Haaning, A., Bilgic, H., Heinen, S., Druka, A., Bayer, M., Waugh, R., and Muehlbauer, G.J. (2018). ELIGULUM-A regulates lateral branch and leaf development in barley. Plant Physiol. *176*, 2750–2760.

Ramsay, L., Comadran, J., Druka, A., Marshall, D.F., Thomas, W.T.B., Macaulay, M., MacKenzie, K., Simpson, C., Fuller, J., Bonar, N., et al. (2011). *INTERMEDIUM-C*, a modifier of lateral spikelet fertility in barley, is an ortholog of the maize domestication gene *TEOSINTE BRANCHED 1*. Nat. Genet. *43*, 169–172.

Russell, J., Mascher, M., Dawson, I.K., Kyriakidis, S., Calixto, C., Freund, F., Bayer, M., Milne, I., Marshall-Griffiths, T., Heinen, S., et al. (2016). Exome sequencing of geographically diverse barley landraces and wild relatives gives insights into environmental adaptation. Nat. Genet. *48*, 1024–1030.

Schmitz, J., Franzen, R., Ngyuen, T.H., Garcia-Maroto, F., Pozzi, C., Salamini, F., and Rohde, W. (2000). Cloning, mapping and expression analysis of barley *MADS-box* genes. Plant Mol. Biol. *42*, 899–913.

Tavakol, E., Okagaki, R., Verderio, G., J, V.S., Hussien, A., Bilgic, H., Scanlon, M.J., Todt, N.R., Close, T.J., Druka, A., et al. (2015). The Barley *Uniculme4* Gene Encodes a BLADE-ON-PETIOLE-Like Protein That Controls Tillering and Leaf Patterning. Plant Physiol. *168*, 164–174.

Turner, A., Beales, J., Faure, S., Dunford, R.P., and Laurie, D.A. (2005). The Pseudo-Response Regulator Ppd-H1 Provides Adaptation to Photoperiod in Barley. Science *310*, 1031–1034.

Yan, L., Fu, D., Li, C., Blechl, A., Tranquilli, G., Bonafede, M., Sanchez, A., Valarik, M., Yasuda, S., and Dubcovsky, J. (2006). The wheat and barley vernalization gene *VRN3* is an orthologue of *FT*. Proc. Natl. Acad. Sci. *103*, 19581–19586.
